# Supplementary material for: Unravelling molecular interaction of the uranyl(vi) complex with bovine serum albumin
Source: Royal Society of Chemistry journal article supplement (doi:10.1039/d4cp02529f), 2024-01-01
Supplement: d4cp02529f1.pdf [file d4cp02529f1.pdf]

## Unravelling Molecular Interaction of Uranyl(VI) Complex with Bovine Serum Albumin

Tankadhar Behera,<sup>‡a</sup> Sipun Sethi,<sup>‡ab</sup> Jyotiprabha Rout,<sup>a</sup> Bhawani Prasad Bag,<sup>\*c</sup> and Nabakrushna Behera<sup>\*a</sup>

<sup>a</sup>*School of Chemistry, Sambalpur University, Jyoti Vihar-768019, Sambalpur, Odisha, India*

<sup>b</sup>*Department of Chemistry, Panchayat College, Bargarh-768028, Odisha, India*

<sup>c</sup>*Department of Biotechnology and Bioinformatics, Sambalpur University, Jyoti Vihar-768019, Sambalpur, Odisha, India*

<sup>‡</sup>*Both the authors contributed equally to this work.*

<sup>\*</sup>*Corresponding authors:*

(1) [bpbag@suniv.ac.in](mailto:bpbag@suniv.ac.in) (Bhawani P. Bag) & (2) [nkbehera@suniv.ac.in](mailto:nkbehera@suniv.ac.in) (N. Behera)

---

### Electronic Supplementary Information

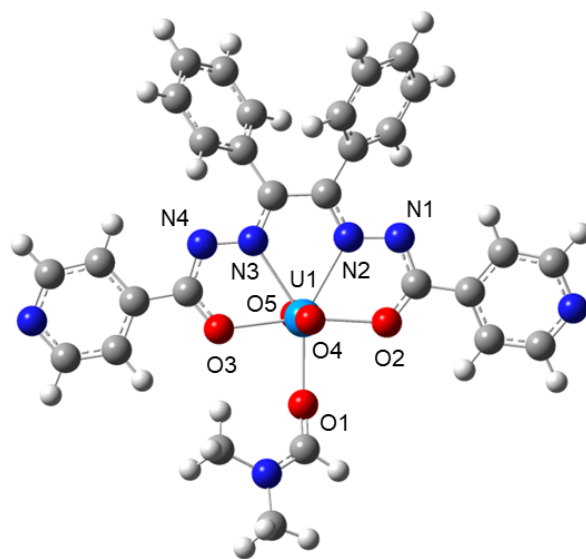

Fig. S1 Energy optimized structure of UC.

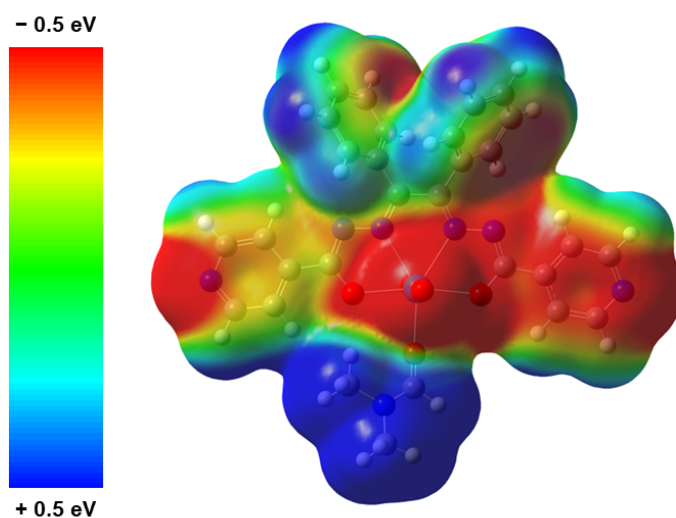

Fig. S2 Molecular electrostatic potential surface of UC.

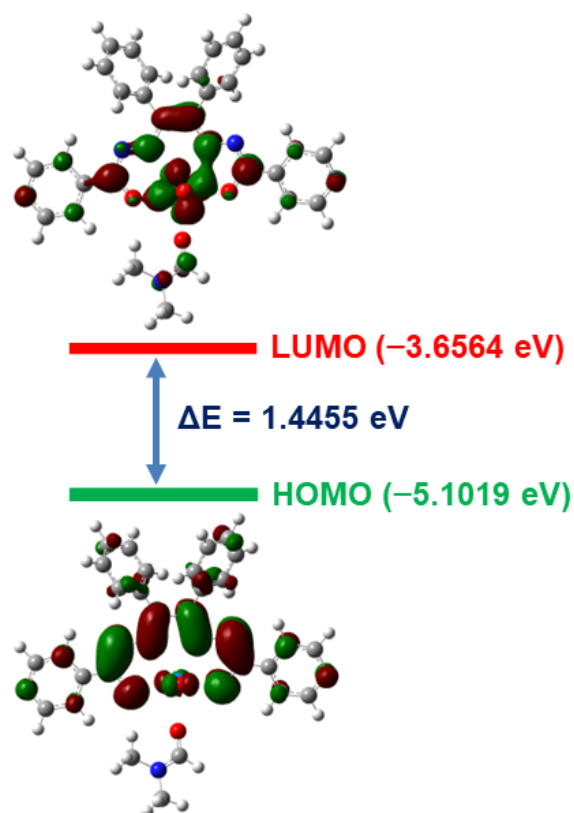

Fig. S3 HOMO-LUMO energy level diagram of UC.

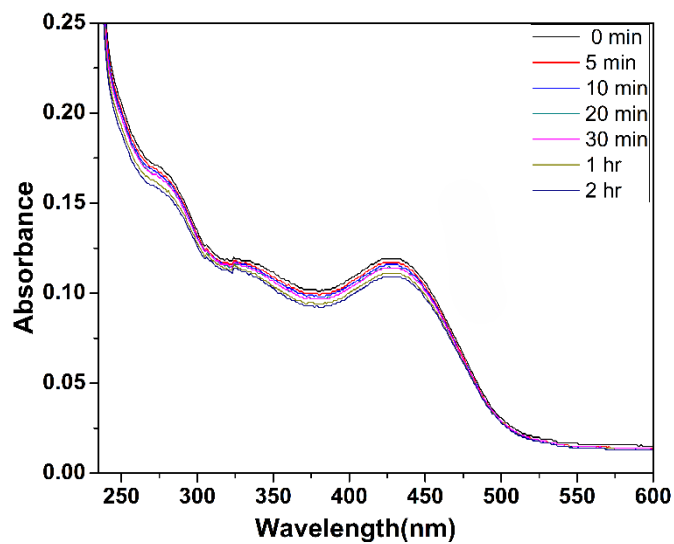

**Fig. S4** UV-vis spectra of UC ( $1.0 \times 10^{-4}$  M) in PBS at different time intervals.

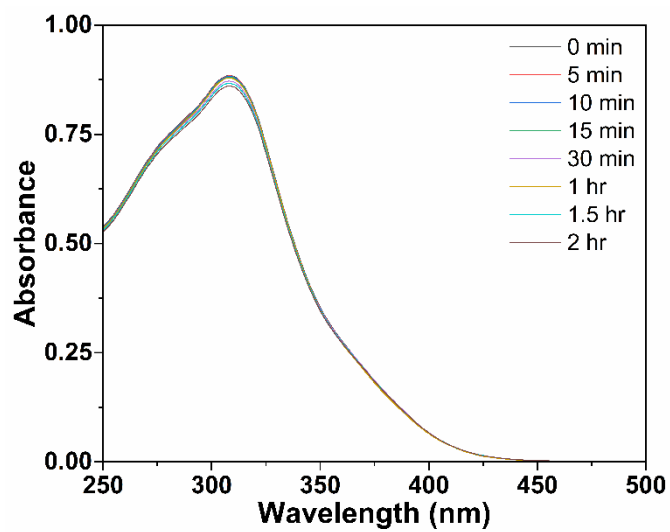

**Fig. S5** UV-vis spectra of H<sub>2</sub>L ( $1.0 \times 10^{-4}$  M) in PBS at different time intervals.

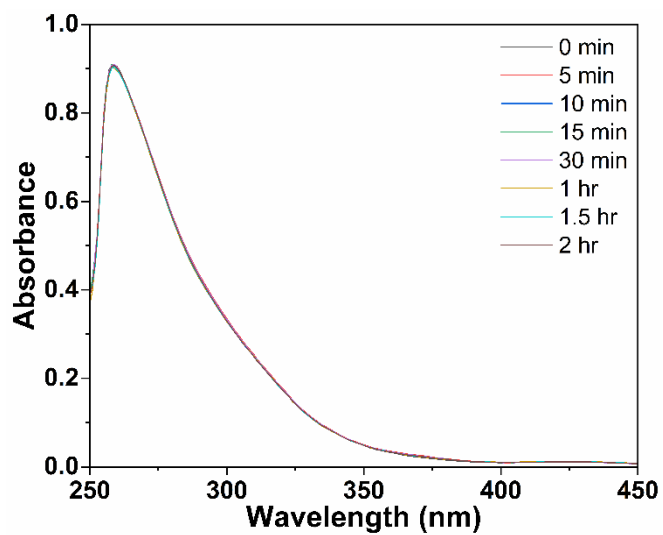

**Fig. S6** UV-vis spectra of UA ( $1.0 \times 10^{-4}$  M) in PBS at different time intervals.

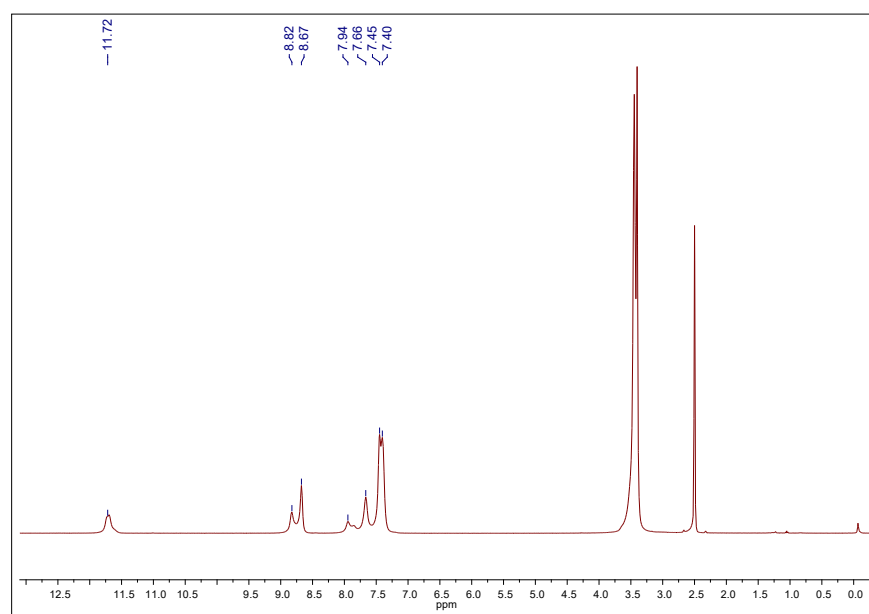

**Fig. S7** <sup>1</sup>H NMR spectrum of H<sub>2</sub>L in DMSO-d<sub>6</sub>.

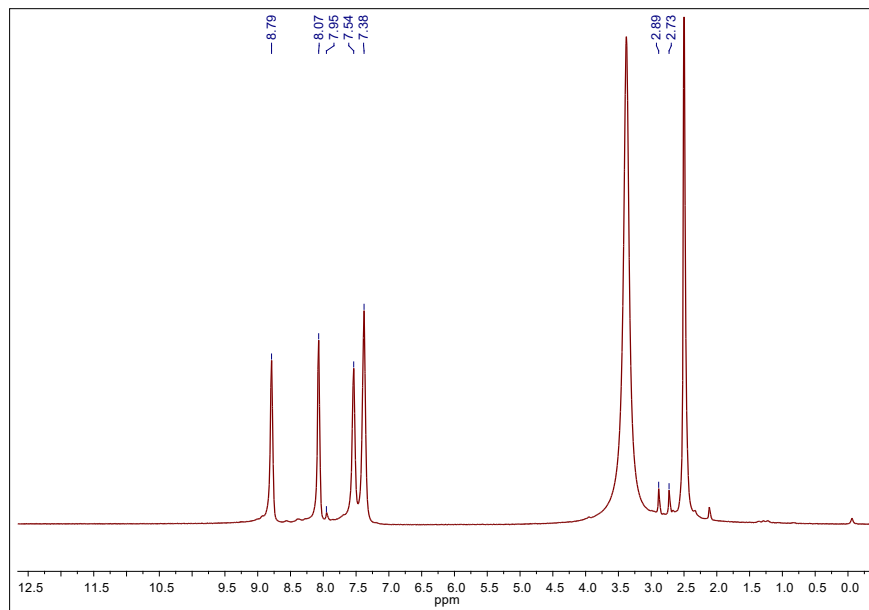

**Fig. S8**  $^1\text{H}$  NMR spectrum of UC in  $\text{DMSO-d}_6$ .

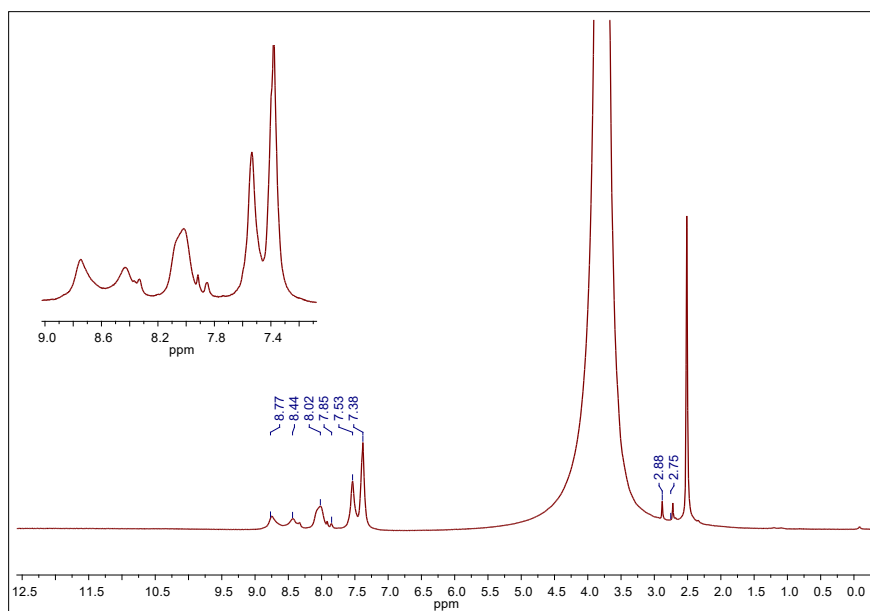

**Fig. S9**  $^1\text{H}$  NMR spectrum of UC in  $\text{DMSO-d}_6$  after 1.5 hr of the PBS addition.

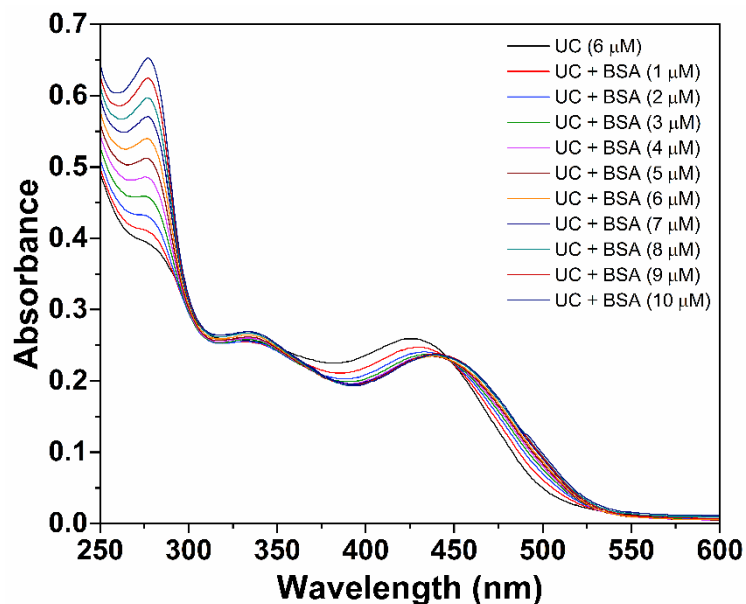

**Fig. S10** UV-vis absorption spectra of UC in PBS with increasing concentration of BSA at 298 K.

(The binding constant,  $K_b$  was determined at a fixed wavelength of 427 nm using the formula:  $[BSA]/(\varepsilon_a - \varepsilon_f) = [BSA]/(\varepsilon_b - \varepsilon_f) + 1/K_b(\varepsilon_b - \varepsilon_f)$ . Where,  $\varepsilon_a$  represents the apparent absorption coefficient calculated from  $A_{obs}/[UC]$ , and  $\varepsilon_b$  and  $\varepsilon_c$  correspond to the extinction coefficients for UC while it was in the fully bound form and free form, respectively. The linear graph between  $\{[BSA]/(\varepsilon_a - \varepsilon_f)\}$  vs.  $[BSA]$  provides the intercept value from which  $K_b$  was calculated).

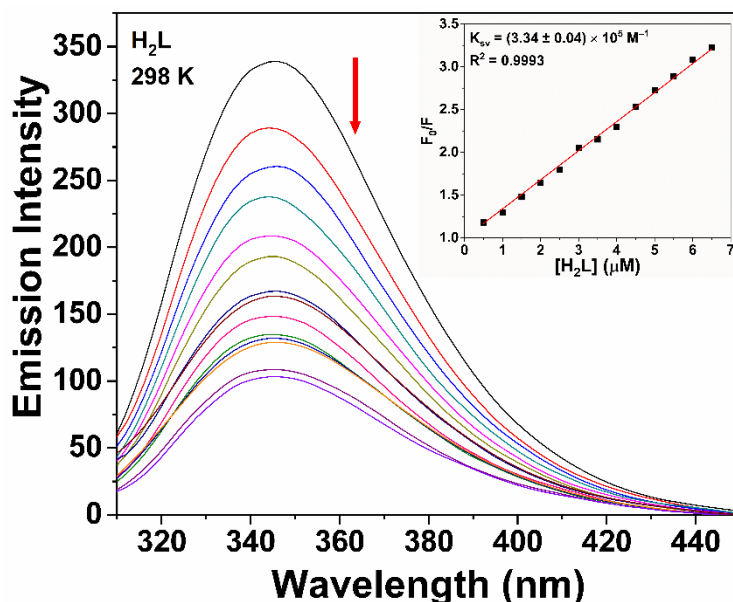

**Fig. S11** The quenching effect of H<sub>2</sub>L on BSA fluorescence at 298 K. Arrow shows the gradual decrease of emission intensity with increasing concentration of H<sub>2</sub>L; Inset: Stern-Volmer plot for quenching of BSA fluorescence by H<sub>2</sub>L.

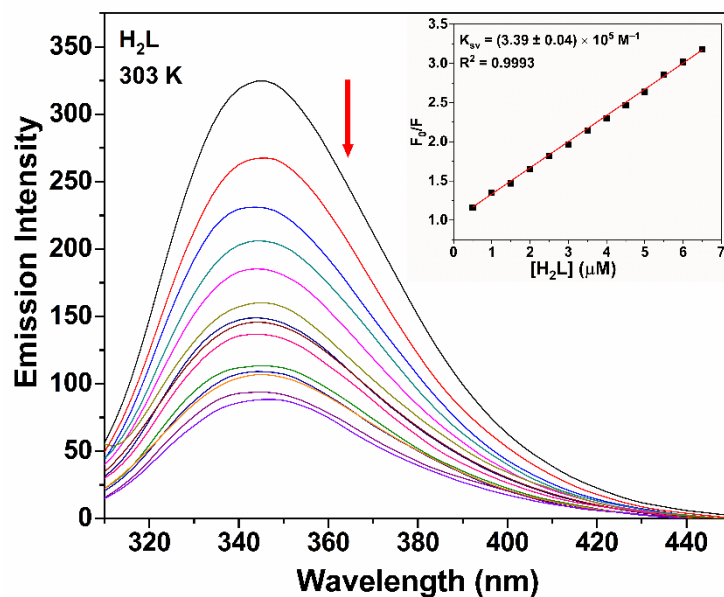

**Fig. S12** The quenching effect of H<sub>2</sub>L on BSA fluorescence at 303 K. Arrow shows the gradual decrease of emission intensity with increasing concentration of H<sub>2</sub>L; Inset: Stern-Volmer plot for quenching of BSA fluorescence by H<sub>2</sub>L.

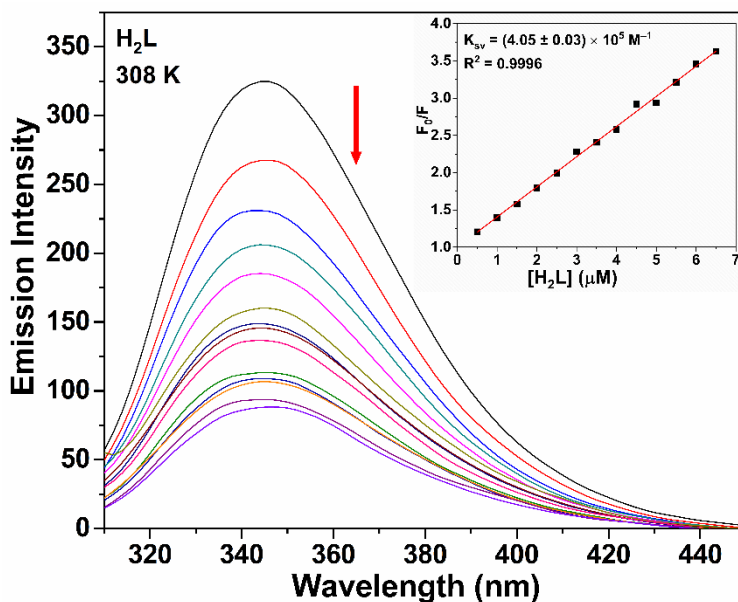

**Fig. S13** The quenching effect of H<sub>2</sub>L on BSA fluorescence at 308 K. Arrow shows the gradual decrease of emission intensity with increasing concentration of H<sub>2</sub>L; Inset: Stern-Volmer plot for quenching of BSA fluorescence by H<sub>2</sub>L.

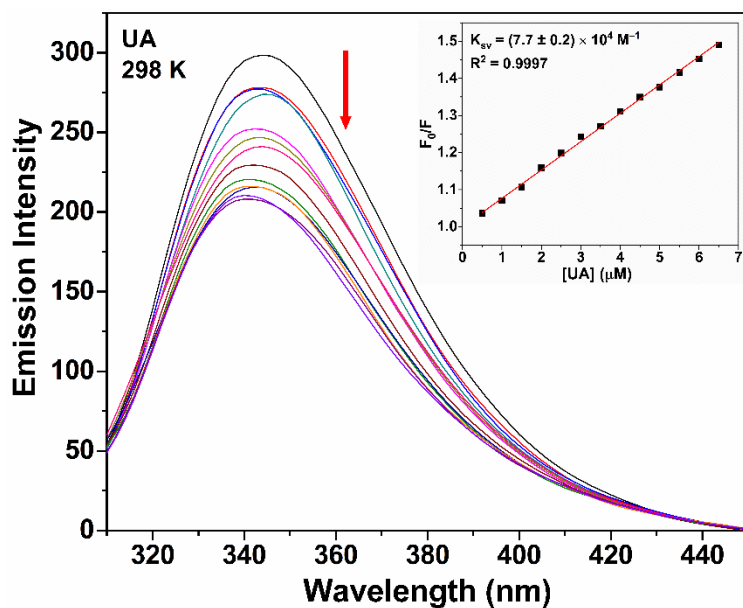

**Fig. S14** The quenching effect of UA on BSA fluorescence at 298 K. Arrow shows the gradual decrease of emission intensity with increasing concentration of UA; Inset: Stern-Volmer plot for quenching of BSA fluorescence by UA.

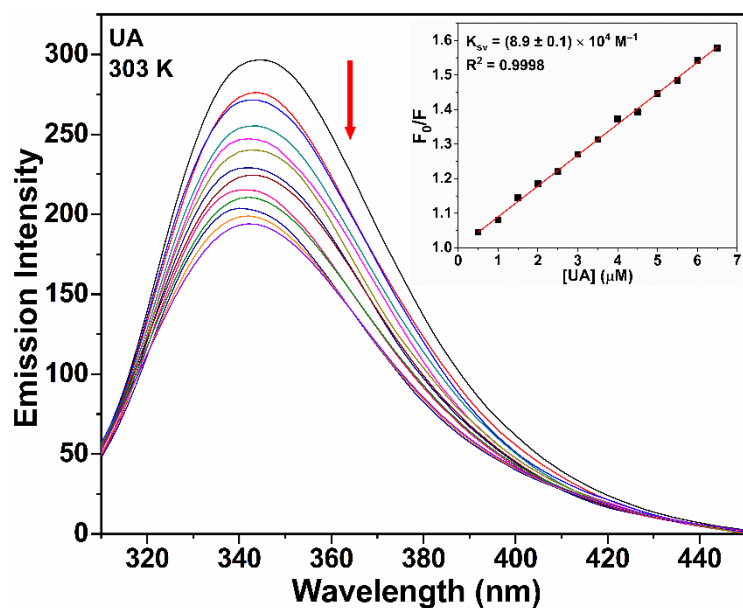

**Fig. S15** The quenching effect of UA on BSA fluorescence at 303 K. Arrow shows the gradual decrease of emission intensity with increasing concentration of UA; Inset: Stern-Volmer plot for quenching of BSA fluorescence by UA.



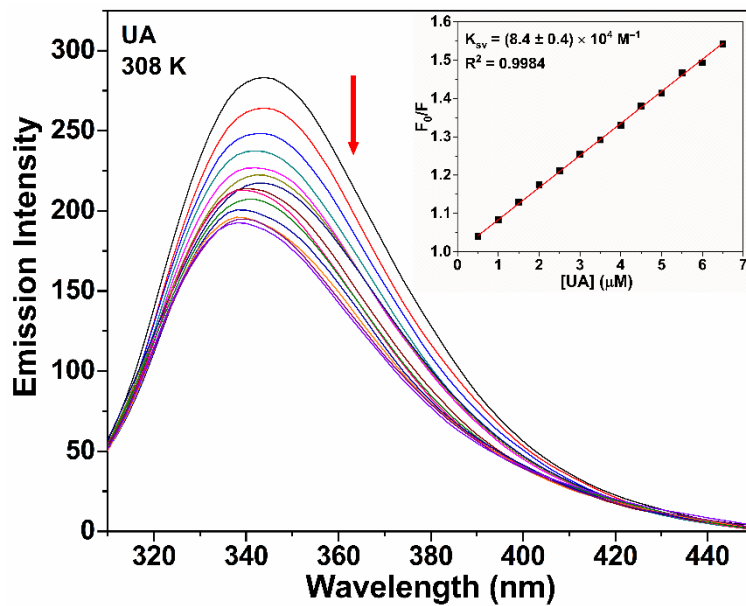

**Fig. S16** The quenching effect of UA on BSA fluorescence at 308 K. Arrow shows the gradual decrease of emission intensity with increasing concentration of UA; Inset: Stern-Volmer plot for quenching of BSA fluorescence by UA.

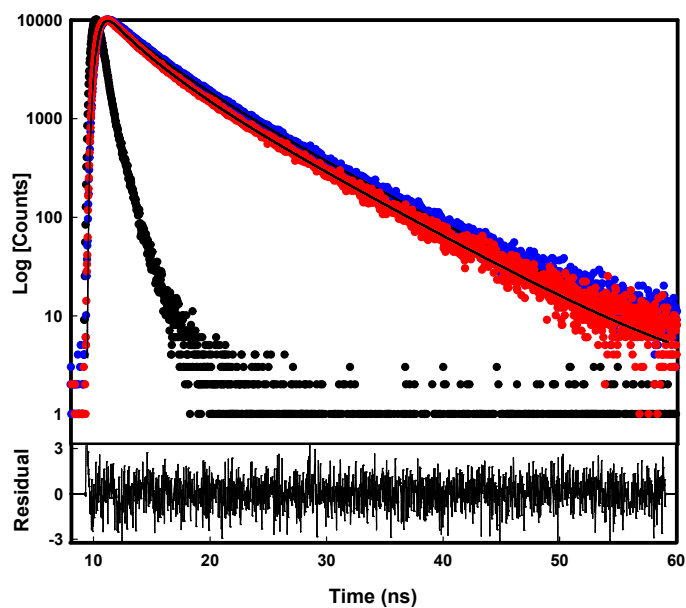

**Fig. S17** Fluorescence lifetime decay profile of BSA in the absence and presence of UC at 298 K.

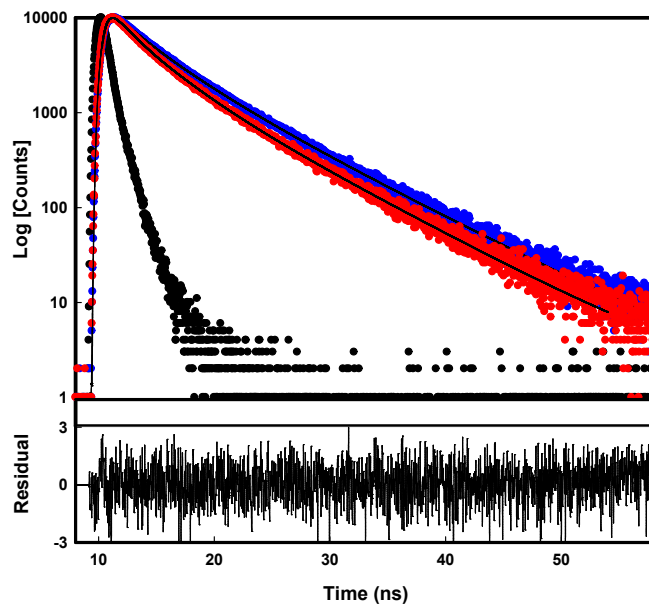

**Fig. S18** Fluorescence lifetime decay profile of BSA in the absence and presence of UC at 303 K.

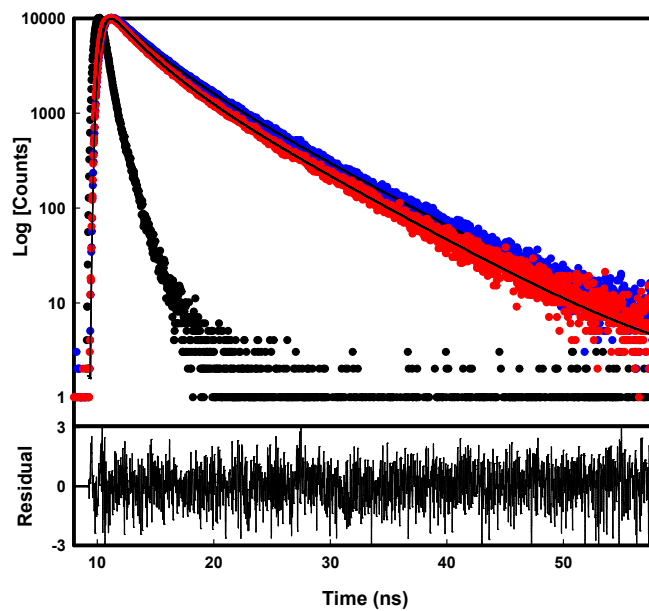

**Fig. S19** Fluorescence lifetime decay profile of BSA in the absence and presence of UC at 308 K.

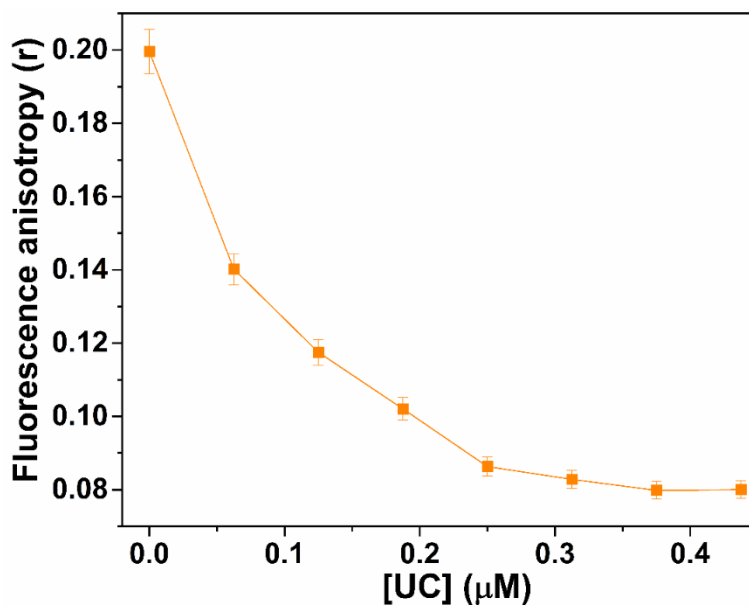

**Fig. S20** The variation of fluorescence anisotropy of BSA with increasing concentration of UC. This experiment was carried out in PBS at 298 K and the concentration of BSA was kept constant at  $1.0 \times 10^{-6}$  M, and the emission was monitored at 343 nm by exciting at 295 nm.

**Table S1** Selected bond lengths (Å) and bond angles (°) of UC.

| Bond lengths |        | Bond angles    |         |                |         |
|--------------|--------|----------------|---------|----------------|---------|
| U(1)–N(2)    | 2.5328 | O(2)–U(1)–O(4) | 88.916  | O(1)–U(1)–O(3) | 84.6615 |
| U(1)–N(3)    | 2.5231 | N(2)–U(1)–O(4) | 88.3642 | O(3)–U(1)–O(4) | 89.5365 |
| U(1)–O(1)    | 2.3654 | N(2)–U(1)–O(2) | 63.8766 | O(3)–U(1)–O(5) | 90.3992 |
| U(1)–O(2)    | 2.302  | N(3)–U(1)–O(4) | 90.4756 | O(1)–U(1)–O(4) | 87.8806 |
| U(1)–O(3)    | 2.3383 | N(3)–U(1)–O(5) | 88.3032 | O(1)–U(1)–O(5) | 93.4361 |
| U(1)–O(4)    | 1.8166 | N(3)–U(1)–N(2) | 62.2522 | O(4)–U(1)–O(5) | 178.67  |
| U(1)–O(5)    | 1.8137 | N(3)–U(1)–O(3) | 63.9188 | O(2)–U(1)–O(5) | 91.3783 |
|              |        | O(1)–U(1)–O(2) | 85.2582 | N(2)–U(1)–O(5) | 90.6007 |

**Table S2** Geometry of UC in XYZ format.

| <b>Atoms</b> | <b>X</b> | <b>Y</b> | <b>Z</b> |
|--------------|----------|----------|----------|
| C            | 4.75365  | 3.72281  | -0.36806 |
| C            | 3.71379  | 2.79630  | -0.58897 |
| C            | 2.58661  | 2.76096  | 0.27507  |
| C            | 2.53565  | 3.65820  | 1.37516  |
| C            | 3.58815  | 4.56839  | 1.60836  |
| C            | 4.69768  | 4.60987  | 0.73327  |
| H            | 5.61062  | 3.74836  | -1.05013 |
| H            | 3.76993  | 2.10018  | -1.43046 |
| H            | 1.67728  | 3.63588  | 2.05478  |
| H            | 3.53822  | 5.24647  | 2.46715  |
| H            | 5.51075  | 5.32353  | 0.90756  |
| C            | 1.46857  | 1.79954  | 0.04882  |
| C            | 0.06421  | 2.24389  | 0.03731  |
| C            | -0.29324 | 3.69158  | -0.01139 |
| C            | 0.29568  | 4.53400  | -0.99134 |
| C            | -1.22422 | 4.24878  | 0.90558  |
| C            | -0.04271 | 5.90228  | -1.05718 |
| H            | 1.00976  | 4.11510  | -1.70811 |
| C            | -1.54304 | 5.62134  | 0.85382  |
| H            | -1.69123 | 3.60507  | 1.65647  |
| C            | -0.95782 | 6.45280  | -0.13071 |
| H            | 0.41186  | 6.53674  | -1.82565 |
| H            | -2.25204 | 6.04141  | 1.57578  |
| H            | -1.21313 | 7.51753  | -0.17504 |
| N            | -0.85063 | 1.25715  | 0.02103  |
| N            | 1.64844  | 0.47529  | -0.10541 |
| N            | 2.95914  | -0.00573 | -0.05436 |
| N            | -2.19422 | 1.63594  | -0.05157 |
| C            | 2.96918  | -1.35143 | -0.19794 |
| C            | -2.99889 | 0.55036  | -0.07048 |
| C            | 4.28143  | -2.04359 | -0.17363 |
| C            | 4.35052  | -3.44223 | -0.39500 |
| C            | 5.49068  | -1.34013 | 0.06866  |
| C            | 5.61246  | -4.07374 | -0.36806 |
| H            | 3.43309  | -4.00651 | -0.58460 |
| C            | 6.70278  | -2.06117 | 0.07810  |
| H            | 5.46607  | -0.26213 | 0.24882  |
| H            | 5.70250  | -5.15269 | -0.53768 |
| H            | 7.65468  | -1.55164 | 0.26466  |
| C            | -4.46238 | 0.79053  | -0.16643 |
| C            | -5.36498 | -0.29799 | -0.26580 |
| C            | -5.00001 | 2.10504  | -0.16578 |

|   |          |          |          |
|---|----------|----------|----------|
| C | -6.74884 | -0.03397 | -0.35179 |
| H | -4.98220 | -1.32174 | -0.28778 |
| C | -6.39802 | 2.26777  | -0.25408 |
| H | -4.32784 | 2.96478  | -0.10390 |
| H | -7.47184 | -0.85380 | -0.43297 |
| H | -6.84479 | 3.26816  | -0.25569 |
| O | 1.85915  | -2.06550 | -0.36641 |
| O | -2.54075 | -0.69931 | -0.00472 |
| U | -0.26035 | -1.18817 | -0.17373 |
| O | -0.39330 | -1.02847 | -1.97553 |
| O | -0.13611 | -1.30786 | 1.63466  |
| O | -1.05457 | -3.41619 | -0.19155 |
| N | -7.28190 | 1.22514  | -0.34492 |
| N | 6.78671  | -3.41154 | -0.13579 |
| C | -1.43246 | -4.57988 | 0.16636  |
| H | -0.75564 | -5.44470 | 0.04817  |
| N | -2.64483 | -4.86681 | 0.69964  |
| C | -3.65666 | -3.81428 | 0.93518  |
| H | -4.57952 | -4.05667 | 0.37690  |
| H | -3.89428 | -3.75958 | 2.01283  |
| H | -3.27054 | -2.83833 | 0.60321  |
| C | -3.00327 | -6.24642 | 1.07955  |
| H | -3.22460 | -6.29866 | 2.16065  |
| H | -3.89563 | -6.57714 | 0.51822  |
| H | -2.17021 | -6.93283 | 0.85608  |

**Table S3** Binding parameters of BSA-H<sub>2</sub>L and BSA-UA systems at three different temperatures.

| H <sub>2</sub> L/UA | T(K)  | K <sub>sv</sub> (L.mol <sup>-1</sup> ) | R <sup>2</sup> | k <sub>q</sub> (L.mol <sup>-1</sup> .s <sup>-1</sup> ) |
|---------------------|-------|----------------------------------------|----------------|--------------------------------------------------------|
| H <sub>2</sub> L    | 298 K | $(3.34 \pm 0.04) \times 10^5$          | 0.9993         | $(5.51 \pm 0.06) \times 10^{13}$                       |
|                     | 303 K | $(3.39 \pm 0.04) \times 10^5$          | 0.9993         | $(5.59 \pm 0.06) \times 10^{13}$                       |
|                     | 308 K | $(4.05 \pm 0.03) \times 10^5$          | 0.9996         | $(6.68 \pm 0.04) \times 10^{13}$                       |
| UA                  | 298 K | $(7.7 \pm 0.2) \times 10^4$            | 0.9997         | $(1.27 \pm 0.03) \times 10^{13}$                       |
|                     | 303 K | $(8.9 \pm 0.1) \times 10^4$            | 0.9998         | $(1.47 \pm 0.02) \times 10^{13}$                       |
|                     | 308 K | $(8.4 \pm 0.4) \times 10^4$            | 0.9984         | $(1.39 \pm 0.06) \times 10^{13}$                       |

**Table S4** Fluorescence lifetime decay of BSA ( $1.0 \times 10^{-6}$  M) in the absence and presence of UC in PBS at three different temperatures.

| T (K) | [UC] ( $\mu$ M) | $\alpha_1$ | $\tau_1$ (ns) | $\alpha_2$ | $\tau_2$ (ns) | $\alpha_3$ | $\tau_3$ (ns) | $\langle\tau\rangle$ (ns) | $\chi^2$ |
|-------|-----------------|------------|---------------|------------|---------------|------------|---------------|---------------------------|----------|
| 298   | 0               | 32.92      | 3.17          | 2.91       | 6.65          | 64.17      | 6.81          | 6.127015                  | 1.01     |
|       | 1.0             | 36.8       | 3.02          | 58.39      | 6.73          | 4.81       | 1.15          | 5.860392                  | 1.28     |
| 303   | 0               | 37.19      | 3.53          | 54.01      | 7.04          | 8.81       | 1             | 6.052134                  | 1.07     |
|       | 1.0             | 40.28      | 3.07          | 49.13      | 6.7           | 10.59      | 7.69          | 6.010717                  | 1.06     |
| 308   | 0               | 36.41      | 3.05          | 6.15       | 7.61          | 57.44      | 6.65          | 5.992657                  | 1.03     |
|       | 1.0             | 37.59      | 2.75          | 11.46      | 7.34          | 50.94      | 6.42          | 5.833069                  | 1.04     |

\* \* \* \* \*
